# Supplementary material
Source: publisher figshare collection journal article supplement (https://gsajournals.figshare.com/ndownloader/files/22772882)
Supplement: Supplementary file 1 [file 22772882]

## Sheet: Table S5 Legend
Table S5: Analysis of chordate COI sequences obtained from the RefSeq database. COI sequences obtained from the RefSeq database (O’Leary et al. 2016) were filtered for chordate entries. MAFFT alignment was performed using the "auto" setting and poorly aligned sequences were deleted. Hummingbird sequences were removed. Four informative, non-hummingbird sequences were characterized by substitution …

## Sheet: COI Chordata RefSeq Non-A153
Species (RefSeq entry)	Position 153	Organism	Prevelance in BOLD entries
YP_009311933.1_Pangio_cf._anguillaris_CBM_ZF_11605	S	Fish (Brown Eel Kuhli Loach)	17/17 informative and aligned BOLD entries for genus Pangio are A at position 153
YP_003264358.1_Serrivomer_sector	S	Fish (Sawtooth Eel)	74/76 informative and aligned BOLD entries for genus Serrivomer are A at position 153
YP_214799.1_Ambystoma_dumerilii	P	Amphibian (Lake Patzcuaro Salamander)	94/96 informative and aligned BOLD entries for genus Ambystoma are A at position 153
NP_008318.1_Polypterus_ornatipinnis	V	Fish (Ornate Bichir)	122/123 informative and aligned BOLD entries for genus Polypterus are A at position 153
